# Supplementary material for: Ce–Nd separation by solid-phase micro-extraction and its application to high-precision 142Nd/144Nd measurements using TIMS in geological materials
Source: Royal Society of Chemistry journal article supplement (doi:10.1039/c4ja00328d), 2014-11-07
Supplement: c4ja00328d1.pdf [file c4ja00328d1.pdf]

# Supporting Information

## **Ce–Nd separation by solid-phase micro-extraction technique and its application in high-precision $^{142}\text{Nd}/^{144}\text{Nd}$ measurements in geological materials**

**Chao-Feng Li, <sup>\*,a</sup> Xuan-Ce Wang<sup>b</sup> You-Lian Li<sup>a</sup>**

**Zhu-Yin Chu<sup>a</sup> Jing-Hui Guo<sup>a</sup> Xiang-Hui Li<sup>c</sup>**

<sup>a</sup>State Key Laboratory of Lithospheric Evolution, Institute of Geology and Geophysics, Chinese Academy of Sciences, Beijing 100029, China

<sup>b</sup>The institute for Geoscience Research (TIGer), Curtin University, GPO Box U1987, Perth, WA6845, Australia

<sup>c</sup>Isotope Research Institute of Henan Academy of Sciences Co. Ltd, Zhengzhou 450052, China

\*Corresponding author: Chao-Feng Li

E-mail address: [cfl@mail.iggcas.ac.cn](mailto:cfl@mail.iggcas.ac.cn)

**Table S-1. Analytical results for JNdi-1 Nd standard obtained between Jan. 2013 and Sep. 2014**

| Run No.   | $^{142}\text{Nd}^+$<br>(V) | $^{142}\text{Nd}/^{144}\text{Nd}$ | 2 SE      | $^{143}\text{Nd}/^{144}\text{Nd}$ | 2 SE      | $^{145}\text{Nd}/^{144}\text{Nd}$ | 2 SE      | $^{148}\text{Nd}/^{144}\text{Nd}$ | 2 SE      | $^{150}\text{Nd}/^{144}\text{Nd}$ | 2 SE      | $^{146}\text{Nd}/^{144}\text{Nd}_m$ |
|-----------|----------------------------|-----------------------------------|-----------|-----------------------------------|-----------|-----------------------------------|-----------|-----------------------------------|-----------|-----------------------------------|-----------|-------------------------------------|
| JNdi-1 1  | 2.94                       | 1.1418376                         | 0.0000044 | 0.5121032                         | 0.0000017 | 0.3484063                         | 0.0000012 | 0.2415807                         | 0.0000017 | 0.2364511                         | 0.0000017 | 0.722807                            |
| JNdi-1 2  | 3.25                       | 1.1418401                         | 0.0000044 | 0.5121042                         | 0.0000016 | 0.3484044                         | 0.0000012 | 0.2415813                         | 0.0000016 | 0.2364508                         | 0.0000017 | 0.722262                            |
| JNdi-1 3  | 3.13                       | 1.1418355                         | 0.0000042 | 0.5121027                         | 0.0000017 | 0.3484056                         | 0.0000012 | 0.2415794                         | 0.0000016 | 0.2364504                         | 0.0000017 | 0.722491                            |
| JNdi-1 4  | 3.09                       | 1.1418399                         | 0.0000043 | 0.5121020                         | 0.0000017 | 0.3484049                         | 0.0000012 | 0.2415837                         | 0.0000017 | 0.2364540                         | 0.0000020 | 0.723118                            |
| JNdi-1 5  | 3.02                       | 1.1418396                         | 0.0000044 | 0.5121039                         | 0.0000017 | 0.3484040                         | 0.0000011 | 0.2415816                         | 0.0000017 | 0.2364528                         | 0.0000019 | 0.723230                            |
| JNdi-1 6  | 3.05                       | 1.1418364                         | 0.0000041 | 0.5121029                         | 0.0000016 | 0.3484054                         | 0.0000011 | 0.2415817                         | 0.0000017 | 0.2364518                         | 0.0000018 | 0.722532                            |
| JNdi-1 7  | 2.87                       | 1.1418353                         | 0.0000042 | 0.5121015                         | 0.0000018 | 0.3484052                         | 0.0000013 | 0.2415827                         | 0.0000021 | 0.2364530                         | 0.0000022 | 0.723370                            |
| JNdi-1 8  | 2.71                       | 1.1418380                         | 0.0000044 | 0.5121040                         | 0.0000017 | 0.3484051                         | 0.0000013 | 0.2415822                         | 0.0000017 | 0.2364522                         | 0.0000019 | 0.722927                            |
| JNdi-1 9  | 3.22                       | 1.1418402                         | 0.0000042 | 0.5121021                         | 0.0000015 | 0.3484060                         | 0.0000011 | 0.2415794                         | 0.0000016 | 0.2364518                         | 0.0000016 | 0.722246                            |
| JNdi-1 10 | 2.91                       | 1.1418350                         | 0.0000041 | 0.5121019                         | 0.0000017 | 0.3484058                         | 0.0000012 | 0.2415798                         | 0.0000017 | 0.2364499                         | 0.0000019 | 0.722553                            |
| JNdi-1 11 | 2.86                       | 1.1418338                         | 0.0000043 | 0.5121013                         | 0.0000017 | 0.3484053                         | 0.0000012 | 0.2415803                         | 0.0000016 | 0.2364510                         | 0.0000019 | 0.722087                            |
| JNdi-1 12 | 3.01                       | 1.1418341                         | 0.0000043 | 0.5121025                         | 0.0000016 | 0.3484062                         | 0.0000012 | 0.2415795                         | 0.0000016 | 0.2364506                         | 0.0000018 | 0.721893                            |
| JNdi-1 13 | 2.75                       | 1.1418400                         | 0.0000044 | 0.5121034                         | 0.0000018 | 0.3484054                         | 0.0000012 | 0.2415829                         | 0.0000018 | 0.2364520                         | 0.0000019 | 0.722643                            |
| JNdi-1 14 | 3.19                       | 1.1418404                         | 0.0000040 | 0.5121039                         | 0.0000016 | 0.3484057                         | 0.0000012 | 0.2415802                         | 0.0000016 | 0.2364512                         | 0.0000017 | 0.722242                            |
| JNdi-1 15 | 3.16                       | 1.1418376                         | 0.0000042 | 0.5121021                         | 0.0000016 | 0.3484062                         | 0.0000012 | 0.2415807                         | 0.0000016 | 0.2364526                         | 0.0000017 | 0.722509                            |
| JNdi-1 16 | 2.68                       | 1.1418364                         | 0.0000043 | 0.5120997                         | 0.0000019 | 0.3484044                         | 0.0000013 | 0.2415784                         | 0.0000018 | 0.2364511                         | 0.0000020 | 0.721793                            |
| JNdi-1 17 | 2.91                       | 1.1418331                         | 0.0000041 | 0.5120999                         | 0.0000018 | 0.3484044                         | 0.0000013 | 0.2415780                         | 0.0000018 | 0.2364502                         | 0.0000020 | 0.721286                            |
| JNdi-1 18 | 3.56                       | 1.1418332                         | 0.0000040 | 0.5121030                         | 0.0000016 | 0.3484067                         | 0.0000011 | 0.2415784                         | 0.0000015 | 0.2364502                         | 0.0000017 | 0.722108                            |
| JNdi-1 19 | 3.02                       | 1.1418297                         | 0.0000045 | 0.5120982                         | 0.0000017 | 0.3484052                         | 0.0000011 | 0.2415790                         | 0.0000017 | 0.2364492                         | 0.0000020 | 0.721051                            |
| JNdi-1 20 | 3.83                       | 1.1418370                         | 0.0000032 | 0.5121002                         | 0.0000011 | 0.3484037                         | 0.0000008 | 0.2415818                         | 0.0000011 | 0.2364526                         | 0.0000012 | 0.722140                            |
| JNdi-1 21 | 4.09                       | 1.1418329                         | 0.0000040 | 0.5120993                         | 0.0000015 | 0.3484039                         | 0.0000010 | 0.2415815                         | 0.0000014 | 0.2364521                         | 0.0000016 | 0.722024                            |
| JNdi-1 22 | 4.01                       | 1.1418383                         | 0.0000034 | 0.5120996                         | 0.0000012 | 0.3484033                         | 0.0000008 | 0.2415809                         | 0.0000012 | 0.2364527                         | 0.0000013 | 0.722438                            |
| JNdi-1 23 | 4.42                       | 1.1418356                         | 0.0000039 | 0.5120991                         | 0.0000014 | 0.3484038                         | 0.0000009 | 0.2415819                         | 0.0000012 | 0.2364540                         | 0.0000015 | 0.722200                            |

|           |      |           |           |           |           |           |           |           |           |           |           |          |
|-----------|------|-----------|-----------|-----------|-----------|-----------|-----------|-----------|-----------|-----------|-----------|----------|
| JNdi-1 24 | 3.36 | 1.1418375 | 0.0000037 | 0.5120994 | 0.0000013 | 0.3484028 | 0.0000009 | 0.2415828 | 0.0000012 | 0.2364566 | 0.0000014 | 0.722459 |
| JNdi-1 25 | 4.08 | 1.1418334 | 0.0000040 | 0.5120989 | 0.0000014 | 0.3484031 | 0.0000010 | 0.2415810 | 0.0000013 | 0.2364547 | 0.0000015 | 0.722172 |
| JNdi-1 26 | 4.58 | 1.1418382 | 0.0000037 | 0.5120997 | 0.0000013 | 0.3484039 | 0.0000009 | 0.2415818 | 0.0000013 | 0.2364543 | 0.0000013 | 0.722360 |
| JNdi-1 27 | 4.21 | 1.1418403 | 0.0000032 | 0.5120999 | 0.0000012 | 0.3484032 | 0.0000008 | 0.2415818 | 0.0000011 | 0.2364535 | 0.0000012 | 0.722486 |
| JNdi-1 28 | 4.83 | 1.1418391 | 0.0000036 | 0.5121003 | 0.0000013 | 0.3484040 | 0.0000009 | 0.2415819 | 0.0000012 | 0.2364531 | 0.0000014 | 0.722191 |
| JNdi-1 29 | 4.11 | 1.1418367 | 0.0000034 | 0.5120995 | 0.0000012 | 0.3484046 | 0.0000009 | 0.2415814 | 0.0000011 | 0.2364546 | 0.0000012 | 0.722177 |
| JNdi-1 30 | 4.76 | 1.1418392 | 0.0000037 | 0.5120998 | 0.0000014 | 0.3484045 | 0.0000009 | 0.2415805 | 0.0000013 | 0.2364525 | 0.0000014 | 0.721634 |
| JNdi-1 31 | 4.54 | 1.1418360 | 0.0000037 | 0.5120996 | 0.0000014 | 0.3484047 | 0.0000009 | 0.2415815 | 0.0000012 | 0.2364538 | 0.0000014 | 0.722088 |
| JNdi-1 32 | 4.32 | 1.1418374 | 0.0000038 | 0.5120987 | 0.0000013 | 0.3484031 | 0.0000009 | 0.2415820 | 0.0000013 | 0.2364551 | 0.0000014 | 0.722265 |
| JNdi-1 33 | 4.01 | 1.1418377 | 0.0000034 | 0.5120996 | 0.0000013 | 0.3484031 | 0.0000008 | 0.2415815 | 0.0000012 | 0.2364546 | 0.0000013 | 0.722422 |
| JNdi-1 34 | 4.65 | 1.1418394 | 0.0000037 | 0.5120996 | 0.0000013 | 0.3484032 | 0.0000009 | 0.2415821 | 0.0000013 | 0.2364547 | 0.0000014 | 0.722362 |
| JNdi-1 35 | 4.12 | 1.1418374 | 0.0000033 | 0.5121001 | 0.0000012 | 0.3484027 | 0.0000008 | 0.2415822 | 0.0000011 | 0.2364546 | 0.0000012 | 0.722510 |
| JNdi-1 36 | 3.01 | 1.1418308 | 0.0000043 | 0.5120995 | 0.0000016 | 0.3484042 | 0.0000012 | 0.2415822 | 0.0000016 | 0.2364520 | 0.0000017 | 0.721799 |
| JNdi-1 37 | 3.13 | 1.1418345 | 0.0000043 | 0.5120990 | 0.0000016 | 0.3484034 | 0.0000011 | 0.2415795 | 0.0000016 | 0.2364527 | 0.0000016 | 0.720378 |
| Mean      |      | 1.1418367 |           | 0.5121009 |           | 0.3484045 |           | 0.2415810 |           | 0.2364525 |           |          |
| 2 SD      |      | 0.0000055 |           | 0.0000036 |           | 0.0000022 |           | 0.0000028 |           | 0.0000034 |           |          |
| 2 RSD (%) |      | 0.00048   |           | 0.00070   |           | 0.00064   |           | 0.00114   |           | 0.00145   |           |          |

Note: The average  $^{142}\text{Nd}^+$  beam signal strength (in volts as measured on  $10^{11}\Omega$ ) in sequence S1 (Table 2) is noted for all analyses. The measured average value for  $^{146}\text{Nd}/^{144}\text{Nd}_m$  in sequence S1 is shown for reference.
